# Supplementary material for: Determination of Blood NOTCH3 Extracellular Domain and Jagged-1 Levels in Healthy Subjects
Source: MDPI journal article supplement (doi:10.3390/ijms231810547), 2022-09-11
Supplement: s1 [file s1]

**Supplemental Table S1 . Blood N3ECD and Jag-1 levels of 279 healthy subjects**

|                               | N3ECD (ng/ml) |        | Jag-1 (ng/ml) |        |
|-------------------------------|---------------|--------|---------------|--------|
|                               | Serum         | Plasma | Serum         | Plasma |
| <b>Number of subjects (n)</b> | 279           | 279    | 279           | 279    |
| <b>25% Percentile</b>         | 38.78         | 4.166  | 7.419         | 7.074  |
| <b>Median</b>                 | 48.74         | 5.731  | 9.745         | 9.397  |
| <b>75% Percentile</b>         | 71.42         | 7.435  | 12.27         | 12.69  |
| <b>Mean</b>                   | 57.61         | 8.08   | 10.62         | 10.62  |
| <b>Std. Deviation</b>         | 27.51         | 18     | 5.312         | 6.193  |

Abbreviations: Std = standard

**Supplemental Figure S1**

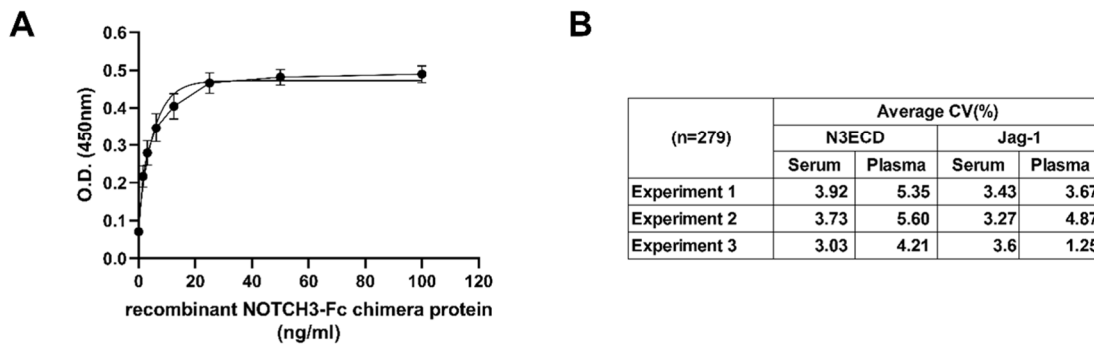

**Supplemental FigureS1.**A. limit of N3ECD protein detection in ELISA method 4-PL of the N3ECD ELISA was found to range up to ~100ng/ml. B. Coefficient variation values of three independent ELISA experiments for N3ECD and Jag1 protein level in serum and Jag1. Four parameter logistic (4PL) curve is a regression model used to analyze ELISA.
